# Supplementary material
Source: PubMed Central journal article supplement (PMC3318638)
Supplement: supp_86.8.4213_TableS1.pdf [file supp_86.8.4213_TableS1.pdf]

| Timepoint | Patient ID | Epitope | Number of Clones Sequenced | Frequency of CD8+ T cells | Number of Cells Sorted |
|-----------|------------|---------|----------------------------|---------------------------|------------------------|
| Pre-ART   | 10001      | TY11    | 71                         | 1.5                       | unrecorded             |
| Post-ART  |            |         | 41                         | 0.2                       | unrecorded             |
| Pre-ART   | 10001      | GY9     | 49                         | 1.3                       | 17000                  |
| Post-ART  |            |         | 41                         | 0.7                       | 5500                   |
| Pre-ART   | 10004      | KF11    | 50                         | 1.9                       | 41000                  |
| Post-ART  |            |         | 54                         | 1.9                       | 7700                   |
| Pre-ART   | 10004      | QW9     | 16                         | 1.1                       | unrecorded             |
| Post-ART  |            |         | 61                         | 2.9                       | 14000                  |
| Pre-ART   | 10027      | FL8     | 42                         | 0.8                       | unrecorded             |
| Post-ART  |            |         | 67                         | 0.1                       | 6300                   |
| Pre-ART   | 10027      | KF11    | 88                         | 0.5                       | unrecorded             |
| Post-ART  |            |         | ND                         | 0.1                       | ND                     |
| Pre-ART   | 10027      | EI8     | 45                         | 0.4                       | unrecorded             |
| Post-ART  |            |         | ND                         | 0.1                       | ND                     |
| Pre-ART   | 10027      | QW9     | 70                         | 0.8                       | 10000                  |
| Post-ART  |            |         | 16                         | 0.1                       | 5500                   |
| Pre-ART   | 10086      | EI8     | 46                         | 1.8                       | 39000                  |
| Post-ART  |            |         | 58                         | 1.1                       | 14500                  |
| Pre-ART   | 10105      | FL8     | 60                         | 0.7                       | 23000                  |
| Post-ART  |            |         | 63                         | 0.2                       | 16000                  |
| Pre-ART   | 10105      | EI8     | ND                         | 1.5                       | 26000                  |
| Post-ART  |            |         | 58                         | 0.3                       | 4500                   |
| Pre-ART   | 10138      | GY9     | 46                         | 2.4                       | 50000                  |
| Post-ART  |            |         | 41                         | 1.2                       | 33000                  |
| Pre-ART   | 10141      | GY9     | 39                         | 0.7                       | 8900                   |
| Post-ART  |            |         | 53                         | 0.5                       | 6000                   |
| Pre-ART   | 20023      | GY9     | 52                         | 2.8                       | 13000                  |
| Post-ART  |            |         | 55                         | 0.3                       | unrecorded             |

\*ND - Not Done
